# Supplementary material for: Cholangiocarcinoma across England: Temporal changes in incidence, survival and routes to diagnosis by region and level of socioeconomic deprivation
Source: PubMed Central journal article supplement — JHEP Rep. 2023 Dec 15;6(3):100983. doi: 10.1016/j.jhepr.2023.100983 (PMC10865079; doi:10.1016/j.jhepr.2023.100983), 2023-12-15
Supplement: mmc1.pdf [file mmc1.pdf]

**Cholangiocarcinoma across England: Temporal changes in incidence, survival and routes to diagnosis by region and level of socioeconomic deprivation**

Daniela Tataru, Shahid A Khan, Roger Hill, Helen Morement, Kwok Wong, Lizz Paley, Mireille B Toledano

Table of contents

|              |   |
|--------------|---|
| Fig. S1..... | 2 |
| Fig. S2..... | 3 |

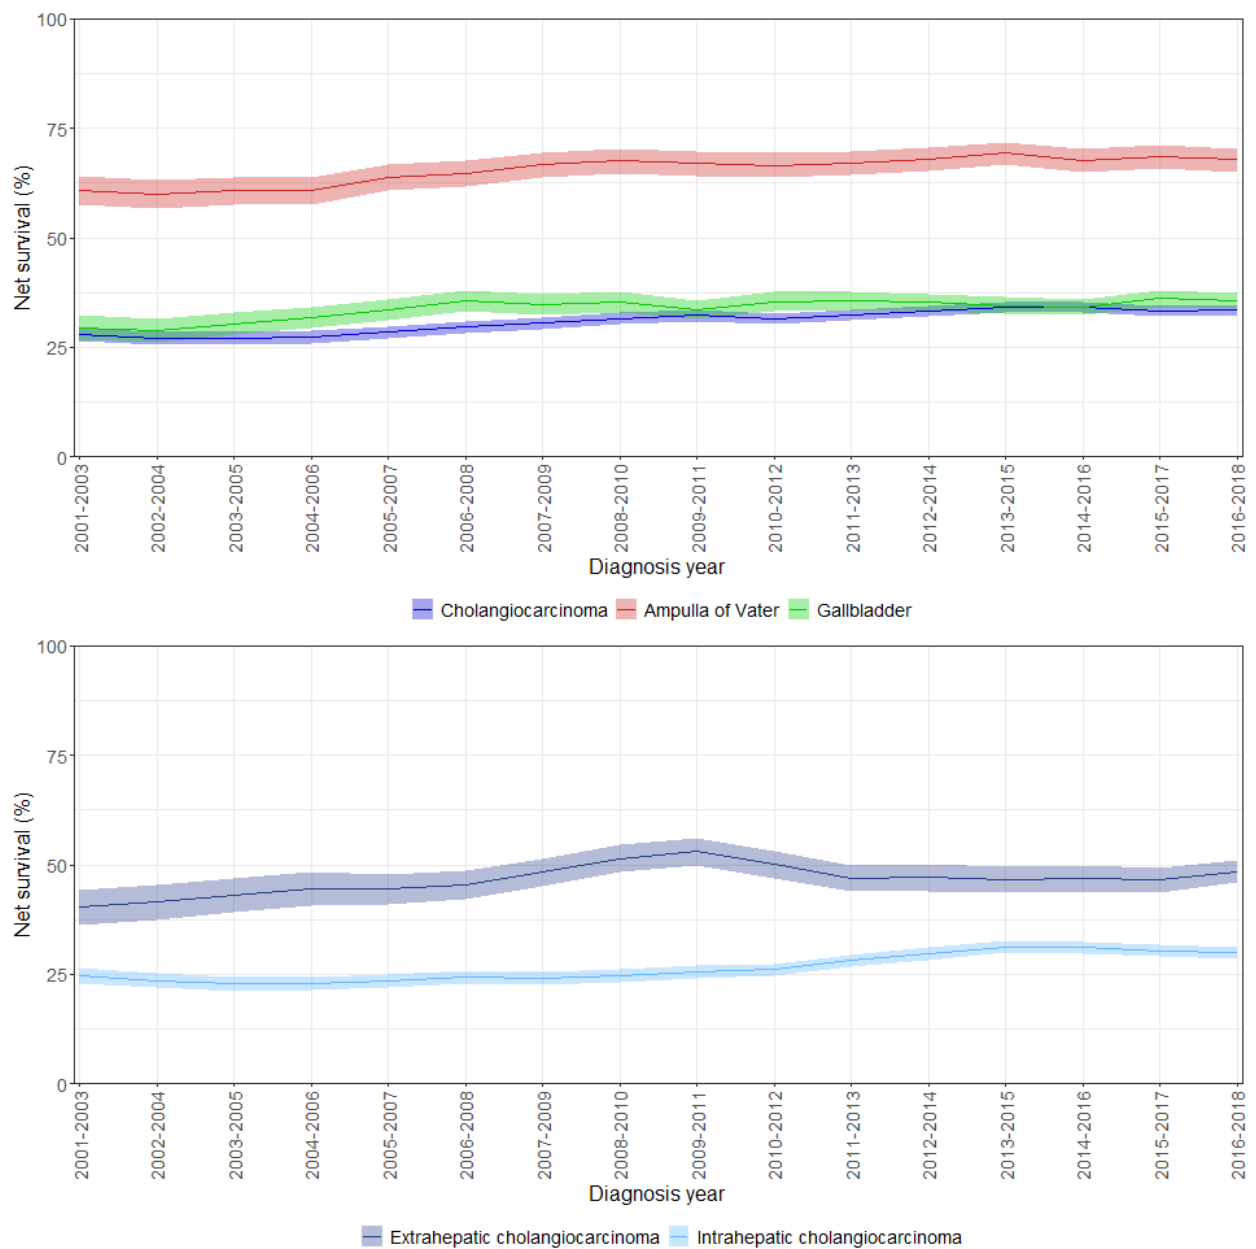

**Fig. S1:** (ONE-YEAR AGE STANDARDISED NET SURVIVAL AND 95% CONFIDENCE INTERVALS: (A) CHOLANGIOCARCINOMA, GALLBLADDER AND AMPULLA OF VATER; (B) INTRAHEPATIC CHOLANGIOCARCINOMA AND EXTRAHEPATIC CHOLANGIOCARCINOMA)

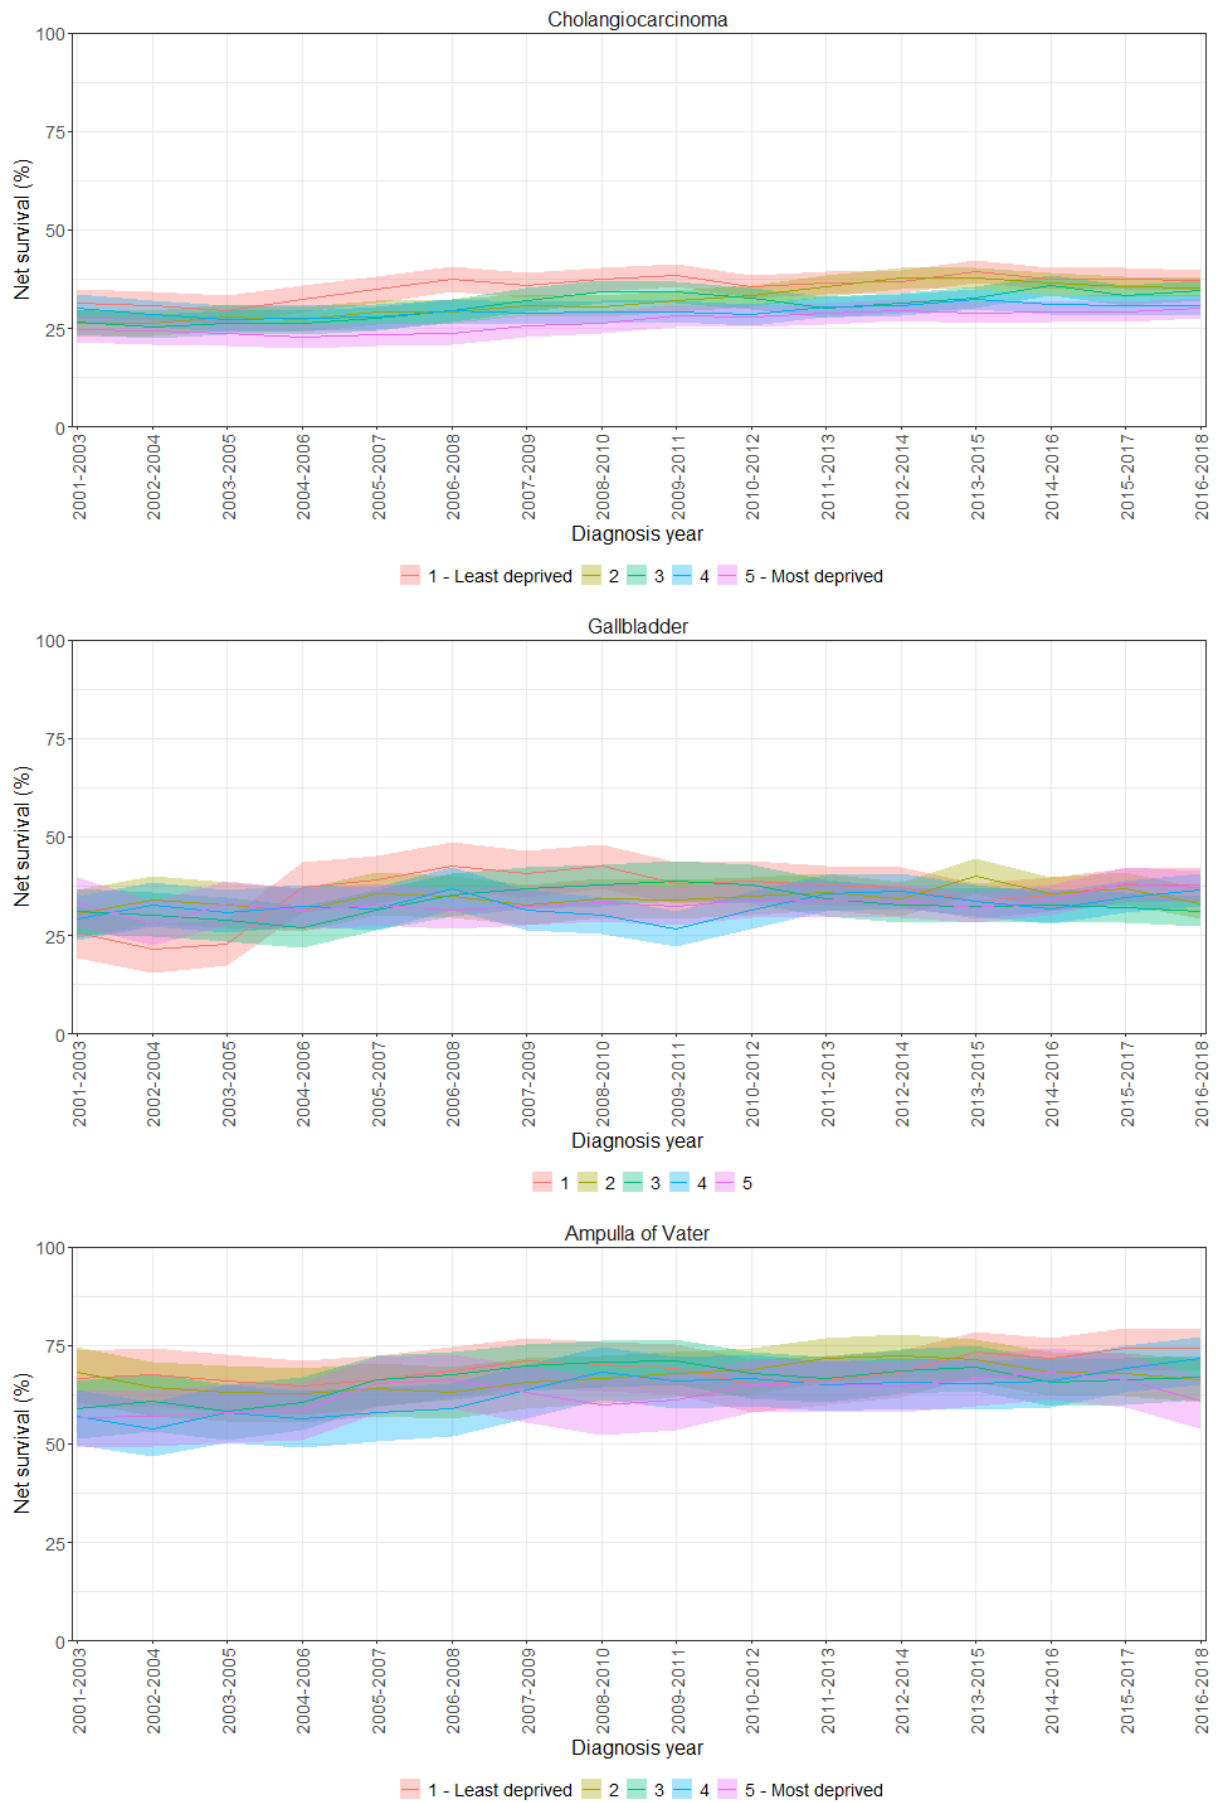

**Fig. S2: (ONE-YEAR AGE-STANDARDISED NET SURVIVAL ESTIMATES WITH 95% CONFIDENCE INTERVALS BY SOCIOECONOMIC DEPRIVATION FOR CHOLANGIOCARCINOMA, GALLBLADDER AND AMPULLA OF VATER)**
